# Supplementary material
Source: PubMed Central journal article supplement (PMC6792459)
Supplement: ehp-127-077007-s001.pdf [file ehp-127-077007-s001.pdf]

**Note to readers with disabilities:** *EHP* strives to ensure that all journal content is accessible to all readers. However, some figures and Supplemental Material published in *EHP* articles may not conform to [508 standards](#) due to the complexity of the information being presented. If you need assistance accessing journal content, please contact [ehp508@niehs.nih.gov](mailto:ehp508@niehs.nih.gov). Our staff will work with you to assess and meet your accessibility needs within 3 working days.

### **Supplemental Material**

#### **Mortality Risk and Fine Particulate Air Pollution in a Large, Representative Cohort of U.S. Adults**

C. Arden Pope III, Jacob S. Lefler, Majid Ezzati, Joshua D. Higbee, Julian D. Marshall, Sun-Young Kim, Matthew Bechle, Kurtis S. Gilliat, Spencer E. Vernon, Allen L. Robinson, and Richard T. Burnett

#### **Table of Contents**

**Table S1.** Estimated hazard ratios (and 95% CIs) for all-cause, cardiopulmonary, and lung cancer mortality for key variables using the sub-cohort and the full complex CPH model.

**Table S2.** Results of model sensitivity analysis comparing hazard ratios (and 95% CIs) for full and sub-cohorts, for complex versus basic CPH models, for models with progressively added control variables, and for alternative exposure and survey periods.

**Table S3.** Results of stratified analysis for the sub-cohort comparing hazard ratios (and 95% CIs) associated with  $10 \mu\text{g}/\text{m}^3$   $\text{PM}_{2.5}$  estimated from the basic CPH model across selected strata of sex, race, age, smoking status, BMI, income, education, marital status, rural/urban, census regions, and survey years. All stratified estimates are adjusted for remaining covariates.

**Figure S1.** Illustration of approach to estimate back-casted, imputed  $\text{PM}_{2.5}$  from 1988-1998. Black circles indicate modeled annual mean  $\text{PM}_{2.5}$  concentrations for the 17 years (1999–2015) with regulatory monitoring data for  $\text{PM}_{2.5}$  estimated using the universal kriging modeling framework. Black squares indicate modeled annual mean  $\text{PM}_{10}$  concentrations for the 28 years (1988–2015) with regulatory monitoring data for  $\text{PM}_{10}$  also estimated using the universal kriging modeling framework. Grey circles indicate the back-casted, imputed  $\text{PM}_{2.5}$  estimated from 1988-1998 based on modeled  $\text{PM}_{10}$  and census –tract mean  $\text{PM}_{2.5}/\text{PM}_{10}$  ratios for 1999-2003. This back-casting approach was used for each census tract separately. For simple illustration, this figure presents averages across all census tracts (urban and rural) in the contiguous U.S. (average  $\text{PM}_{2.5}/\text{PM}_{10}$  ratio for 1999-2003 was 0.58).

**Table S1. Estimated hazard ratios (and 95% CIs) for all-cause, cardiopulmonary, and lung cancer mortality for key variables using the sub-cohort and the full complex CPH model.**

|                                            | All Causes of Death |           | Cardiopulmonary <sup>a</sup> |           | Lung Cancer <sup>a</sup> |             |
|--------------------------------------------|---------------------|-----------|------------------------------|-----------|--------------------------|-------------|
|                                            | Hazard Ratio        | 95% CI    | Hazard Ratio                 | 95% CI    | Hazard Ratio             | 95% CI      |
| PM <sub>2.5</sub> (x10 µg/m <sup>3</sup> ) | 1.12                | 1.08-1.15 | 1.23                         | 1.17-1.29 | 1.12                     | 1.00-1.26   |
| Income                                     |                     |           |                              |           |                          |             |
| \$ 0-35,000                                | 1.59                | 1.55-1.63 | 1.77                         | 1.70-1.84 | 1.34                     | 1.23-1.46   |
| \$ 35-50,000                               | 1.34                | 1.31-1.37 | 1.46                         | 1.40-1.52 | 1.20                     | 1.09-1.32   |
| \$ 50-75,000                               | 1.19                | 1.16-1.22 | 1.26                         | 1.21-1.31 | 1.11                     | 1.03-1.21   |
| \$ 75,000+                                 | 1.00                | ---       | 1.00                         | ---       | 1.00                     | ---         |
| Marital Status                             |                     |           |                              |           |                          |             |
| Married                                    | 1.00                | ---       | 1.00                         | ---       | 1.00                     | ---         |
| Divorced                                   | 1.12                | 1.10-1.15 | 1.12                         | 1.09-1.16 | 1.05                     | 0.97-1.13   |
| Separated                                  | 1.16                | 1.11-1.21 | 1.21                         | 1.13-1.29 | 1.03                     | 0.89-1.19   |
| Never Married                              | 1.25                | 1.22-1.28 | 1.30                         | 1.24-1.36 | 0.88                     | 0.79-0.98   |
| Widowed                                    | 1.11                | 1.09-1.13 | 1.14                         | 1.11-1.18 | 1.06                     | 0.98-1.15   |
| Education                                  |                     |           |                              |           |                          |             |
| < High School grad                         | 1.00                | ---       | 1.00                         | ---       | 1.00                     | ---         |
| High School grad                           | 0.88                | 0.87-0.89 | 0.86                         | 0.84-0.88 | 0.82                     | 0.77-0.88   |
| Some College                               | 0.83                | 0.82-0.85 | 0.83                         | 0.80-0.86 | 0.73                     | 0.67-0.79   |
| College grad                               | 0.72                | 0.70-0.74 | 0.69                         | 0.66-0.72 | 0.59                     | 0.53-0.66   |
| >College grad                              | 0.68                | 0.66-0.70 | 0.64                         | 0.60-0.67 | 0.46                     | 0.41-0.53   |
| Urban/Rural                                |                     |           |                              |           |                          |             |
| Urban                                      | 1.00                | ---       | 1.00                         | ---       | 1.00                     | ---         |
| Rural                                      | 0.97                | 0.96-0.99 | 0.99                         | 0.96-1.01 | 1.02                     | 0.96-1.09   |
| Region                                     |                     |           |                              |           |                          |             |
| Northeast                                  | 0.94                | 0.92-0.96 | 0.91                         | 0.87-0.94 | 1.04                     | 0.96-1.13   |
| Midwest                                    | 0.97                | 0.95-0.99 | 0.94                         | 0.91-0.97 | 1.14                     | 1.05-1.24   |
| South                                      | 1.06                | 1.04-1.08 | 1.05                         | 1.01-1.08 | 1.24                     | 1.14-1.34   |
| West                                       | 1.00                | ---       | 1.00                         | ---       | 1.00                     | ---         |
| BMI                                        |                     |           |                              |           |                          |             |
| <20                                        | 1.38                | 1.35-1.42 | 1.47                         | 1.41-1.54 | 1.38                     | 1.26-1.51   |
| 20-25                                      | 1.00                | ---       | 1.00                         | ---       | 1.00                     | ---         |
| 25-30                                      | 0.96                | 0.94-0.97 | 0.98                         | 0.96-1.01 | 0.80                     | 0.75-0.85   |
| 30-35                                      | 1.11                | 1.08-1.13 | 1.18                         | 1.14-1.21 | 0.80                     | 0.73-0.87   |
| >35                                        | 1.52                | 1.47-1.56 | 1.80                         | 1.73-1.88 | 0.69                     | 0.60-0.80   |
| Smoking                                    |                     |           |                              |           |                          |             |
| Never                                      | 1.00                | ---       | 1.00                         | ---       | 1.00                     | ---         |
| Current                                    | 2.16                | 2.12-2.21 | 2.39                         | 2.32-2.46 | 15.11                    | 13.70-16.66 |
| Former                                     | 1.32                | 1.30-1.35 | 1.38                         | 1.35-1.42 | 4.90                     | 4.44-5.42   |

Note: All models were adjusted for age, sex, race, income, education, marital status, urban versus rural, census regions, survey year, smoking status, BMI and the complex NHIS survey design.

<sup>a</sup>Cause-of-death groupings are based on International Statistical Classification of Diseases, Injuries, and Causes of Death, Tenth Revision (ICD-10). Cardiopulmonary disease includes cardiovascular disease (I00-I09, I11, I13, I20-I51), cerebrovascular disease (I60-I69), chronic lower respiratory disease (J40-J47), and influenza and pneumonia (J09-J18). Lung cancer includes C33-C34.

**Table S2. Results of model sensitivity analysis comparing hazard ratios (and 95% CIs) for full and sub-cohorts, for complex versus basic CPH models, for models with progressively added control variables, and for alternative exposure and survey periods.**

|                                                                                               | Cohort | All Causes of Death |           | Cardiopulmonary |           | Lung Cancer  |           |
|-----------------------------------------------------------------------------------------------|--------|---------------------|-----------|-----------------|-----------|--------------|-----------|
|                                                                                               |        | Hazard Ratio        | 95% CI    | Hazard Ratio    | 95% CI    | Hazard Ratio | 95% CI    |
| Complete Complex CPH Model                                                                    | Full   | 1.13                | 1.11-1.16 | 1.24            | 1.20-1.29 | 1.08         | 0.99-1.18 |
| Complete Basic CPH Model                                                                      | Full   | 1.13                | 1.11-1.15 | 1.24            | 1.20-1.27 | 1.09         | 1.01-1.17 |
|                                                                                               |        |                     |           |                 |           |              |           |
| Complete Complex CPH Model                                                                    | Sub    | 1.12                | 1.08-1.15 | 1.23            | 1.17-1.29 | 1.12         | 1.00-1.26 |
| Complete Basic CPH Model                                                                      | Sub    | 1.13                | 1.09-1.16 | 1.24            | 1.19-1.30 | 1.12         | 1.00-1.25 |
| Excluding smoking and BMI                                                                     | Sub    | 1.12                | 1.09-1.15 | 1.24            | 1.18-1.29 | 1.09         | 0.97-1.22 |
|                                                                                               |        |                     |           |                 |           |              |           |
| Basic CPH Model, control for age, sex, race                                                   | Full   | 1.18                | 1.16-1.20 | 1.31            | 1.27-1.34 | 1.23         | 1.16-1.32 |
| Basic CPH Model, control for age, sex, race                                                   | Sub    | 1.18                | 1.15-1.21 | 1.33            | 1.27-1.39 | 1.22         | 1.10-1.35 |
| + smoking status                                                                              | Sub    | 1.17                | 1.13-1.20 | 1.31            | 1.26-1.37 | 1.16         | 1.05-1.29 |
| + BMI                                                                                         | Sub    | 1.16                | 1.13-1.20 | 1.31            | 1.26-1.37 | 1.17         | 1.05-1.29 |
| + income                                                                                      | Full   | 1.20                | 1.18-1.22 | 1.33            | 1.30-1.37 | 1.27         | 1.19-1.35 |
|                                                                                               | Sub    | 1.17                | 1.14-1.20 | 1.32            | 1.27-1.38 | 1.18         | 1.06-1.30 |
| + education                                                                                   | Full   | 1.17                | 1.15-1.19 | 1.30            | 1.26-1.33 | 1.20         | 1.13-1.28 |
|                                                                                               | Sub    | 1.15                | 1.12-1.18 | 1.29            | 1.24-1.35 | 1.14         | 1.02-1.26 |
| + marital status                                                                              | Full   | 1.15                | 1.13-1.17 | 1.27            | 1.24-1.31 | 1.19         | 1.11-1.27 |
|                                                                                               | Sub    | 1.14                | 1.11-1.17 | 1.27            | 1.22-1.33 | 1.14         | 1.03-1.26 |
| + urban/rural                                                                                 | Full   | 1.13                | 1.11-1.15 | 1.26            | 1.22-1.29 | 1.14         | 1.07-1.22 |
|                                                                                               | Sub    | 1.12                | 1.09-1.16 | 1.26            | 1.20-1.32 | 1.17         | 1.05-1.30 |
| + region                                                                                      | Full   | 1.14                | 1.12-1.16 | 1.27            | 1.20-1.31 | 1.10         | 1.03-1.18 |
|                                                                                               | Sub    | 1.14                | 1.10-1.17 | 1.28            | 1.22-1.34 | 1.11         | 1.00-1.24 |
| + indicators for each survey year (Complete Basic CPH Model)                                  | Full   | 1.13                | 1.11-1.15 | 1.24            | 1.20-1.27 | 1.09         | 1.01-1.17 |
|                                                                                               | Sub    | 1.13                | 1.09-1.16 | 1.24            | 1.19-1.30 | 1.12         | 1.00-1.25 |
|                                                                                               |        |                     |           |                 |           |              |           |
| Basic CPH model; Mean PM <sub>2.5</sub> 1988-2015 (1988-1998 imputed); Survey years 1986-2014 | Full   | 1.10                | 1.08-1.11 | 1.17            | 1.14-1.19 | 1.09         | 1.03-1.15 |
|                                                                                               | Sub    | 1.09                | 1.07-1.12 | 1.17            | 1.13-1.21 | 1.09         | 1.00-1.20 |
| Basic CPH model; Mean PM <sub>2.5</sub> 1999-2015; Survey years 1999-2014                     | Full   | 1.22                | 1.18-1.27 | 1.31            | 1.23-1.39 | 1.13         | 0.98-1.30 |
|                                                                                               | Sub    | 1.17                | 1.11-1.23 | 1.23            | 1.13-1.33 | 1.16         | 0.95-1.41 |

Note: Cause-of-death groupings are based on International Statistical Classification of Diseases, Injuries, and Causes of Death, Tenth Revision (ICD-10). Cardiopulmonary disease includes cardiovascular disease (I00-I09, I11, I13, I20-I51), cerebrovascular disease (I60-I69), chronic lower respiratory disease (J40-J47), and influenza and pneumonia (J09-J18). Lung cancer includes C33-C34.

**Table S3. Results of stratified analysis for the sub-cohort comparing hazard ratios (and 95% CIs) associated with 10 µg/m<sup>3</sup> PM<sub>2.5</sub> estimated from the basic CPH model across selected strata of sex, race, age, smoking status, BMI, income, education, marital status, rural/urban, census regions, and survey years. All stratified estimates are adjusted for remaining covariates.**

|                             | All Causes of Death |           | Cardiopulmonary |           | Lung Cancer  |           |
|-----------------------------|---------------------|-----------|-----------------|-----------|--------------|-----------|
|                             | Hazard Ratio        | 95% CI    | Hazard Ratio    | 95% CI    | Hazard Ratio | 95% CI    |
| <b>SEX</b>                  |                     |           |                 |           |              |           |
| Male                        | 1.13                | 1.08-1.17 | 1.21            | 1.14-1.29 | 1.11         | 0.95-1.29 |
| Female                      | 1.13                | 1.08-1.17 | 1.27            | 1.20-1.35 | 1.13         | 0.96-1.33 |
| <b>RACE-ETHNICITY</b>       |                     |           |                 |           |              |           |
| Non-Hispanic White          | 1.11                | 1.07-1.15 | 1.25            | 1.19-1.32 | 1.12         | 0.99-1.28 |
| Hispanic                    | 1.20                | 1.11-1.30 | 1.19            | 1.03-1.37 | 1.28         | 0.83-1.96 |
| Non-Hispanic Black          | 1.15                | 1.05-1.27 | 1.26            | 1.08-1.46 | 0.93         | 0.64-1.34 |
| Other/unknown               | 1.10                | 0.94-1.28 | 1.29            | 1.00-1.67 | 0.91         | 0.48-1.71 |
| <b>AGE (at survey year)</b> |                     |           |                 |           |              |           |
| Age 18-64                   | 1.19                | 1.15-1.24 | 1.30            | 1.21-1.40 | 1.15         | 0.99-1.33 |
| Age 65-74                   | 1.08                | 1.02-1.14 | 1.23            | 1.14-1.33 | 1.06         | 0.86-1.30 |
| Age 75-84                   | 1.05                | 0.99-1.11 | 1.18            | 1.09-1.28 | 1.04         | 0.77-1.41 |
| <b>SMOKING STATUS</b>       |                     |           |                 |           |              |           |
| Never Smoker                | 1.20                | 1.15-1.25 | 1.42            | 1.32-1.53 | 1.77         | 1.26-2.49 |
| Current Smoker              | 1.09                | 1.03-1.15 | 1.16            | 1.06-1.27 | 1.01         | 0.87-1.17 |
| Former Smoker               | 1.07                | 1.02-1.12 | 1.14            | 1.06-1.23 | 1.11         | 0.91-1.35 |
| <b>BMI</b>                  |                     |           |                 |           |              |           |
| < 20                        | 1.25                | 1.12-1.39 | 1.28            | 1.09-1.52 | 1.30         | 0.89-1.89 |
| 20-25                       | 1.10                | 1.05-1.16 | 1.23            | 1.14-1.33 | 1.09         | 0.91-1.29 |
| 25-30                       | 1.14                | 1.09-1.20 | 1.26            | 1.17-1.36 | 1.24         | 1.02-1.50 |
| 30-35                       | 1.10                | 1.01-1.18 | 1.21            | 1.07-1.37 | 0.99         | 0.70-1.39 |
| > 35                        | 1.16                | 1.04-1.30 | 1.31            | 1.10-1.56 | 0.84         | 0.46-1.56 |
| <b>INCOME</b>               |                     |           |                 |           |              |           |
| \$0-35,000                  | 1.13                | 1.08-1.17 | 1.21            | 1.14-1.28 | 1.03         | 0.88-1.22 |
| \$35-50,000                 | 1.15                | 1.07-1.23 | 1.33            | 1.19-1.49 | 1.50         | 1.14-1.97 |
| \$50-75,000                 | 1.19                | 1.11-1.29 | 1.39            | 1.22-1.57 | 1.16         | 0.87-1.53 |
| \$75,000+                   | 1.07                | 1.00-1.16 | 1.19            | 1.05-1.35 | 1.00         | 0.76-1.31 |
| <b>EDUCATION</b>            |                     |           |                 |           |              |           |
| < High school graduate      | 1.15                | 1.10-1.21 | 1.19            | 1.11-1.29 | 1.10         | 0.90-1.33 |
| High school graduate        | 1.11                | 1.05-1.16 | 1.23            | 1.14-1.33 | 1.11         | 0.92-1.34 |
| Some college                | 1.12                | 1.04-1.19 | 1.23            | 1.11-1.37 | 1.14         | 0.88-1.46 |
| College graduate            | 1.12                | 1.01-1.25 | 1.45            | 1.21-1.73 | 1.12         | 0.72-1.75 |

|                       |      |           |      |           |      |           |
|-----------------------|------|-----------|------|-----------|------|-----------|
| > College graduate    | 1.13 | 1.00-1.28 | 1.32 | 1.07-1.63 | 1.35 | 0.78-2.33 |
| <b>MARITAL STATUS</b> |      |           |      |           |      |           |
| Married               | 1.14 | 1.10-1.19 | 1.23 | 1.15-1.31 | 1.14 | 0.97-1.33 |
| Divorced              | 1.19 | 1.10-1.28 | 1.43 | 1.26-1.62 | 1.19 | 0.92-1.55 |
| Separated             | 1.14 | 0.96-1.36 | 0.98 | 0.74-1.29 | 1.68 | 0.87-3.24 |
| Never married         | 1.23 | 1.12-1.34 | 1.39 | 1.18-1.63 | 1.18 | 0.74-1.86 |
| Widowed               | 1.06 | 1.00-1.12 | 1.21 | 1.11-1.31 | 0.84 | 0.65-1.08 |
| <b>URBAN-RURAL</b>    |      |           |      |           |      |           |
| Urban                 | 1.13 | 1.10-1.17 | 1.27 | 1.20-1.33 | 1.12 | 0.98-1.27 |
| Rural                 | 1.10 | 1.03-1.18 | 1.15 | 1.03-1.28 | 1.09 | 0.84-1.40 |
| <b>CENSUS REGION</b>  |      |           |      |           |      |           |
| Northeast             | 1.10 | 1.01-1.19 | 1.18 | 1.03-1.34 | 0.91 | 0.67-1.23 |
| Midwest               | 1.27 | 1.18-1.36 | 1.46 | 1.30-1.64 | 1.27 | 0.97-1.66 |
| South                 | 1.11 | 1.04-1.19 | 1.13 | 1.03-1.25 | 1.10 | 0.87-1.39 |
| West                  | 1.09 | 1.05-1.14 | 1.24 | 1.15-1.32 | 1.10 | 0.92-1.32 |
| <b>SURVEY YEAR</b>    |      |           |      |           |      |           |
| 1986-1995             | 1.08 | 1.04-1.13 | 1.24 | 1.17-1.31 | 1.05 | 0.90-1.22 |
| 1996-2005             | 1.19 | 1.14-1.26 | 1.26 | 1.16-1.37 | 1.24 | 1.02-1.51 |
| 2006-2014             | 1.16 | 1.06-1.27 | 1.17 | 1.01-1.37 | 1.15 | 0.81-1.62 |

Note: Cause-of-death groupings are based on International Statistical Classification of Diseases, Injuries, and Causes of Death, Tenth Revision (ICD-10). Cardiopulmonary disease includes cardiovascular disease (I00-I09, I11, I13, I20-I51), cerebrovascular disease (I60-I69), chronic lower respiratory disease (J40-J47), and influenza and pneumonia (J09-J18). Lung cancer includes C33-C34.

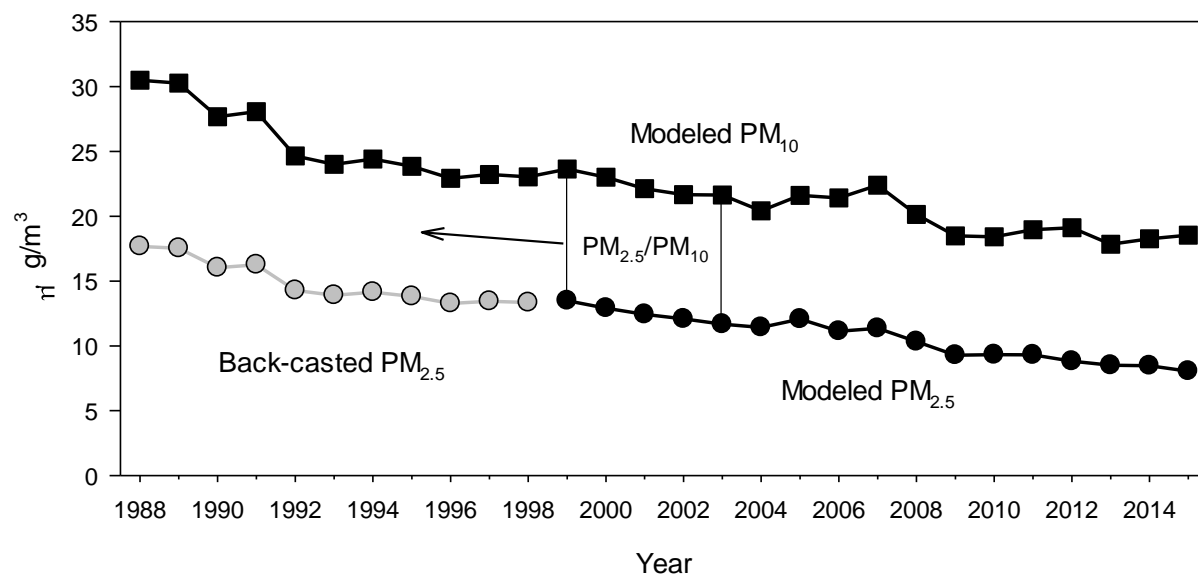

**Figure S1. Illustration of approach to estimate back-casted, imputed PM<sub>2.5</sub> from 1988-**

**1998.** Black circles indicate modeled annual mean PM<sub>2.5</sub> concentrations for the 17 years (1999–2015) with regulatory monitoring data for PM<sub>2.5</sub> estimated using the universal kriging modeling framework. Black squares indicate modeled annual mean PM<sub>10</sub> concentrations for the 28 years (1988–2015) with regulatory monitoring data for PM<sub>10</sub> also estimated using the universal kriging modeling framework. Grey circles indicate the back-casted, imputed PM<sub>2.5</sub> estimated from 1988-1998 based on modeled PM<sub>10</sub> and census –tract mean PM<sub>2.5</sub>/PM<sub>10</sub> ratios for 1999-2003. This back-casting approach was used for each census tract separately. For simple illustration, this figure presents averages across all census tracts (urban and rural) in the contiguous U.S. (average PM<sub>2.5</sub>/PM<sub>10</sub> ratio for 1999-2003 was 0.58).
