# Supplementary material
Source: PubMed Central journal article supplement (PMC6792459)
Supplement: ehp-127-077007-s002.pdf [file ehp-127-077007-s002.pdf]

**Note to readers with disabilities:** *EHP* strives to ensure that all journal content is accessible to all readers. However, some figures and Supplemental Material published in *EHP* articles may not conform to [508 standards](#) due to the complexity of the information being presented. If you need assistance accessing journal content, please contact [ehp508@niehs.nih.gov](mailto:ehp508@niehs.nih.gov). Our staff will work with you to assess and meet your accessibility needs within 3 working days.

### **Supplemental Material**

#### **Mortality Risk and Fine Particulate Air Pollution in a Large, Representative Cohort of U.S. Adults**

C. Arden Pope III, Jacob S. Lefler, Majid Ezzati, Joshua D. Higbee, Julian D. Marshall, Sun-Young Kim, Matthew Bechle, Kurtis S. Gilliat, Spencer E. Vernon, Allen L. Robinson, and Richard T. Burnett

#### **Table of Contents**

**Table S1.** Estimated hazard ratios (and 95% CIs) for all-cause, cardiopulmonary, and lung cancer mortality for key variables using the sub-cohort and the full complex CPH model.

**Table S2.** Results of model sensitivity analysis comparing hazard ratios (and 95% CIs) for full and sub-cohorts, for complex versus basic CPH models, for models with progressively added control variables, and for alternative exposure and survey periods.

**Table S3.** Results of stratified analysis for the sub-cohort comparing hazard ratios (and 95% CIs) associated with  $10 \mu\text{g}/\text{m}^3$   $\text{PM}_{2.5}$  estimated from the basic CPH model across selected strata of sex, race, age, smoking status, BMI, income, education, marital status, rural/urban, census regions, and survey years. All stratified estimates are adjusted for remaining covariates.

**Figure S1.** Illustration of approach to estimate back-casted, imputed  $\text{PM}_{2.5}$  from 1988-1998. Black circles indicate modeled annual mean  $\text{PM}_{2.5}$  concentrations for the 17 years (1999–2015) with regulatory monitoring data for  $\text{PM}_{2.5}$  estimated using the universal kriging modeling framework. Black squares indicate modeled annual mean  $\text{PM}_{10}$  concentrations for the 28 years (1988–2015) with regulatory monitoring data for  $\text{PM}_{10}$  also estimated using the universal kriging modeling framework. Grey circles indicate the back-casted, imputed  $\text{PM}_{2.5}$  estimated from 1988-1998 based on modeled  $\text{PM}_{10}$  and census –tract mean  $\text{PM}_{2.5}/\text{PM}_{10}$  ratios for 1999-2003. This back-casting approach was used for each census tract separately. For simple illustration, this figure presents averages across all census tracts (urban and rural) in the contiguous U.S. (average  $\text{PM}_{2.5}/\text{PM}_{10}$  ratio for 1999-2003 was 0.58).
